# Supplementary material for: LPM3770277, a Potent Novel CDK4/6 Degrader, Exerts Antitumor Effect Against Triple-Negative Breast Cancer
Source: PubMed Central journal article supplement (PMC9037595; doi:10.3389/fphar.2022.853993), 2022-04-11
Supplement: Table1.pdf [file Table1.pdf]

| compounds  | species | Remaining amount after 60min incubation (%) | k (min <sup>-1</sup> ) | T <sub>1/2</sub> (min) | Cl <sub>int, microsome</sub> (μL·min <sup>-1</sup> ·mg <sup>-1</sup> proteins) | CL <sub>int, in vivo</sub> (mL/min/kg) | Clearance Classification |
|------------|---------|---------------------------------------------|------------------------|------------------------|--------------------------------------------------------------------------------|----------------------------------------|--------------------------|
| LPM3770277 | Human   | 61                                          | 0.0067                 | 103                    | 13.4                                                                           | 12.7                                   | middle                   |
|            | Rat     | 81                                          | 0.0041                 | 169                    | 8.20                                                                           | 14.8                                   | Low                      |
|            | Mouse   | 71                                          | 0.0051                 | 136                    | 10.2                                                                           | 41.3                                   | middle                   |

Table S1: Stability test of LPM3770277 in human, rat and mouse liver microsomes
