# Supplementary material for: LPM3770277, a Potent Novel CDK4/6 Degrader, Exerts Antitumor Effect Against Triple-Negative Breast Cancer
Source: PubMed Central journal article supplement (PMC9037595; doi:10.3389/fphar.2022.853993), 2022-04-11
Supplement: Table2.pdf [file Table2.pdf]

Table S2 Pharmacokinetic parameters

| PK parameters | AUC <sub>0-∞</sub> (h*ng/ml) | C <sub>max</sub> (ng/mL) | T <sub>1/2</sub> (h) | MRT(h) |
|---------------|------------------------------|--------------------------|----------------------|--------|
| Plasma        | 841                          | 528                      | 3.05                 | 1.18   |
| Tumor         | 388                          | 163                      | -                    | 1.75   |

Note: Three BABL/C mice in each group were orally administered with 57.9 mg/kg of LPM3770277 suspension. blood samples were collected at pre-dose (0 hr), and at post-dose 15 min, 1 hr, 2 hrs, 4 hrs, 8 hrs, 12 hrs, 24 hrs.
